# Supplementary material for: Central Nervous System Involvement in Trichinellosis: A Systematic Review
Source: MDPI journal article supplement (doi:10.3390/diagnostics11060945), 2021-05-25
Supplement: s1 [file s1]

**Supplementary Table 1.** Characteristics of included cases.

| Study       | Year | No of cases | Age | Clinical signs                                                    | CSF                                                                                                                                     | Autopsy                                                                                                                                                                                                                                                                                                                                                                                                                                         | Neuroimaging | Other                                                         |
|-------------|------|-------------|-----|-------------------------------------------------------------------|-----------------------------------------------------------------------------------------------------------------------------------------|-------------------------------------------------------------------------------------------------------------------------------------------------------------------------------------------------------------------------------------------------------------------------------------------------------------------------------------------------------------------------------------------------------------------------------------------------|--------------|---------------------------------------------------------------|
| Frothingham | 1906 | 1 F         | -   | -                                                                 | N/A                                                                                                                                     | Many areas of slight hemorrhage into the brain substance, around which there is no marked cellular reaction.<br>Areas of cellular infiltration. The cells are mainly endothelial and neuroglia cells with an occasional leucocyte or lymphocyte.<br>In such an area, part of a trichina embryo sometimes appears outside the vessels.<br>Around these areas, the neuroglia presents a slight reaction (phosphotungstic acid hematoxylin stain). | N/A          | Outcome: death                                                |
| Van Cott    | 1914 | 1 F         | 21  | Headache<br>Mydriasis<br>Kerning sign<br>Diminished knee reflexes | Pressure: moderate<br>Albumin: normal<br>Sediment: slight greyish-white<br>Cells: Lymphocytes<br>Young actively moving trichinae +      | N/A                                                                                                                                                                                                                                                                                                                                                                                                                                             | N/A          | Outcome: death                                                |
| Lintz       | 1916 | 3           | -   | -                                                                 | Clear<br>Albumin: faint trace<br>Globulin absent<br>Trichinae embryos: 1-4/field<br>Occasional lymphocytes                              | N/A                                                                                                                                                                                                                                                                                                                                                                                                                                             | N/A          | Blood: leukocytosis with eosinophilia                         |
| Elliot      | 1916 | 1 F         | 14  | Headache, vomiting<br>Kerning sign                                | Pressure: moderately increased<br>Clear<br>Cells: 3 cells/mm <sup>3</sup><br>Actively motile trichina larvae +                          | N/A                                                                                                                                                                                                                                                                                                                                                                                                                                             | N/A          | Blood: Leukocytosis with eosinophilia                         |
| Salzer      | 1916 | 14          | -   | Kerning – 100%<br>Reflexes – abolished in lower limbs – 100%      | Trichinae + (8 cases)<br>In one case trichinae were still found in the CSF of a child 3 years of age, 3 months after clinical recovery. | Trichinae occurred abundantly in the brain, and on injection of such tissue into animals the disease can be produced, the eosinophilia being more marked than any other form of production of the disease.                                                                                                                                                                                                                                      | N/A          | The leukocytosis diminished as the eosinophilia increased.    |
| Cummins     | 1916 | 1           | -   | -                                                                 | Cells: absent<br>Trichina embryo +                                                                                                      | N/A                                                                                                                                                                                                                                                                                                                                                                                                                                             | N/A          | Blood: leukocytosis with eosinophilia<br>Outcome: improvement |
| Bloch       | 1917 | 1           | 23  | Headache                                                          | Trichinella: absent                                                                                                                     | Intense meningeal congestion,                                                                                                                                                                                                                                                                                                                                                                                                                   | N/A          | Outcome: death                                                |

|          |      |     |          |                                                                                                                                                                              |                                                                                                                                                      |                                                                                                                                                                                                                                                                                                                |     |                                                                                     |
|----------|------|-----|----------|------------------------------------------------------------------------------------------------------------------------------------------------------------------------------|------------------------------------------------------------------------------------------------------------------------------------------------------|----------------------------------------------------------------------------------------------------------------------------------------------------------------------------------------------------------------------------------------------------------------------------------------------------------------|-----|-------------------------------------------------------------------------------------|
|          |      |     |          | Delirium<br>Generalized and jacksonian seizures<br>Left hemiparesis<br>Bilateral pyramidal signs<br>Coma                                                                     |                                                                                                                                                      | edema of the posterior half of the right hemisphere and slight opacity of the pia.<br>No Trichinae in the brain, no infiltrations, nodules or syncytia, Marked état criblé, glia reticulum and neuronophagic phenomena, with other signs of severe ganglion cell lesions, but without accumulation of lipoids. |     |                                                                                     |
| Meyer    | 1918 | 1 F | 6 years  | Meningitis: Headache, vomiting, marked irritability, rigidity of the neck, Kerning sign<br>Absent knee reflexes                                                              | Pressure: increased<br>Clear<br>58 cells/mm <sup>3</sup><br>Lymphocytes present<br>Organisms -                                                       | N/A                                                                                                                                                                                                                                                                                                            | N/A | Blood: leukocytosis with eosinophilia<br>Outcome: improvement                       |
|          |      | 1 M | 8 years  | Meningitis: headache, vomiting, Kerning sign<br>Brisk knee jerks<br>Babinski doubtful                                                                                        | Pressure: increased<br>Clear<br>50 cells/mm <sup>3</sup><br>Lymphocytes +                                                                            | N/A                                                                                                                                                                                                                                                                                                            | N/A | Blood: leukocytosis with eosinophilia<br>Outcome: improvement<br>Associated: Herpes |
|          |      | 1 F | 12 years | Meningitis: neck rigidity<br>Kerning sign +, Brudzinski sign –<br>absent knee reflexes                                                                                       | Pressure: increased<br>Clear<br>240 cells/mm <sup>3</sup><br>Lymphocytes +<br>Albumine -<br>Actively motile<br>ous trichinae +<br>Trichina larvae +. |                                                                                                                                                                                                                                                                                                                |     | Blood: leukocytosis with eosinophilia<br>Associated: Herpes                         |
| Sterling | 1925 | 1 F | 26 years | Headache<br>Hemiplegia right<br>Hemihypoesthesia<br>Motor aphasia<br>Brisk lower limb reflexes                                                                               | N/A                                                                                                                                                  | N/A                                                                                                                                                                                                                                                                                                            | N/A | Outcome: improved                                                                   |
|          |      | 1 M | 56       | Unconsciousness, followed by left hemiparesis<br>Brisk lower limb reflexes                                                                                                   | -                                                                                                                                                    | -                                                                                                                                                                                                                                                                                                              | -   | Outcome: improved                                                                   |
| Horlick  | 1929 | 1 F | 52       | Headache<br>Stupor<br>Left spastic hemiparesis<br>Incoherent speech<br>Disorientation<br>Brisk knee jerks, biceps, triceps and achilles reflexes.<br>Bilateral Babinski sign | Trichinella +                                                                                                                                        | N/A                                                                                                                                                                                                                                                                                                            | N/A | Blood: leukocytosis with eosinophilia<br>Outcome: death                             |
| Hassin   | 1926 | 1 M | 14       | Headache<br>Delirium                                                                                                                                                         | The spinal fluid removed at the necropsy<br>Numerous trichina larvae                                                                                 | <b>Macroscopic:</b><br>The pia of the brain was transparent, with marked congestion in some areas;<br>The sulci, especially in the frontal lobe, were gaping;<br>The gyri were of normal size and                                                                                                              | N/A | Leukocytosis with eosinophilia<br>Outcome: death:                                   |

not flattened.

Normal base of the brain

The ventricles were not dilated, the cortical gray matter was sharply defined from the white substance.

Congested cerebral parenchyma, without foci of softening or hemorrhage.

**Microscopic:**

The pia-arachnoid, throughout the cortex and the base of the brain, was markedly infiltrated, some areas (occipital and Ammon's horn) more, some (frontal lobe, cerebellum) less.

The infiltrative elements in some regions (cerebellum), were mostly large lymphocytes in the form of homogeneous, pale, round or slightly oval bodies containing an eccentric nucleus fairly rich in chromatin. In other areas mesothelial cells predominated and often formed clusters. As a rule, these types of cells were mixed with a great variety of other elements—plasma cells, fat granule bodies (gitter cells), fibroblasts and macrophages, which sometimes contained within their vacuoles lymphocytes or polymorphonuclear leukocytes. The latter were mostly eosinophils

These occasionally formed dense masses or foci.

Typical embryos of *Trichina* were found. They were absent in the blood vessels, which were slightly infiltrated and markedly congested.

Hemorrhages and blood pigment granules were absent, but red cells, mostly well preserved, were abundantly scattered among the cellular elements

The pia-arachnoid changes may be designated as an acute non-suppurative leptomeningitis.

Some areas in the frontal lobe of the brain and in the pons exhibited numerous small, round or oblong

cavities. These were, for the most part empty; some contained a collapsed blood vessel, the walls of which were sometimes connected with the surrounding parenchyma by strands of glia tissue.

In rare instances, the cavities were adjacent to or surrounded ganglion cells, while the brain substance itself appeared slightly rarefied.

Disintegration was quite evident in the basal portions of the pons, where lacunae were present.

Small islands or nodules consisting of glia cells and enclosing portions of Trichinae embryos, while the adjacent nerve tissue was rarefied, showing as glia reticulum.

The foregoing cell conglomerations or nodules were also present in brain areas that showed no disintegration. They appeared as granulomas and were cellular.

The nodules invariably harbored a Trichina embryo, whole or a fragment of it, but no blood vessels or ganglion cells. They were scattered in large numbers throughout the white brain substance, basal ganglia, pons and cerebellum, but were absent in the cortex.

Rarely a stray Trichina was encountered in the parenchyma.

Pronounced changes in the blood vessels. Throughout the cortex, midbrain, medulla and other regions the arteries and the veins were greatly infiltrated.

The blood vessels were also densely hyperemic, and their endothelial as well as adventitial cells markedly hypertrophied and hyperplastic.

Hemorrhages, in the form of small foci, occasionally were present around a capillary or small blood vessel.

In contrast to the larger blood vessels, the capillaries exhibited no

signs of adventitial infiltration, but their endothelial layer was markedly hypertrophied.  
The capillaries and the arteries and veins uniformly showed the presence of lipoid substances  
In the spaces outside the tufts or choroid villi, lying freely in the cavity of the fourth and lateral ventricles, were present *Trichina* larvae  
Histologic changes may be defined as diffuse, degenerative and inflammatory, with marked hyperplastic phenomena in the pia-arachnoid, choroid plexus and glia (syncytia and nodule formation).  
Typical of acute encephalitis, they were associated with the presence of *Trichina* embryos in the cerebral parenchyma, nodules, infiltrated adventitial and subarachnoid spaces and in the cerebral ventricles. These changes strikingly resemble those of other types of acute nonsuppurative encephalitis.

|        |      |     |    |                                                                                                                                                                                                                                                        |                                                                                               |                                                      |                                                                            |                                                                                                                                                                                                             |
|--------|------|-----|----|--------------------------------------------------------------------------------------------------------------------------------------------------------------------------------------------------------------------------------------------------------|-----------------------------------------------------------------------------------------------|------------------------------------------------------|----------------------------------------------------------------------------|-------------------------------------------------------------------------------------------------------------------------------------------------------------------------------------------------------------|
| Salan  | 1928 | 1 F | 16 | Neck stiffness<br>The optic disks were congested, with blurred margins (right > left).<br>Weakness of the left external rectus muscle<br>Right central facial weakness<br>Right hemiparesis<br>Bilateral Babinski sign<br>Tendon reflexes right > left | Increased pressure<br>Absent cells<br>Increased glucose (mild)<br><i>Trichinella</i> larvae + | N/A                                                  | N/A                                                                        | <i>Trichina</i> + in blood, muscle<br>Blood: mild anemia, a slight leukocytosis and a marked eosinophilia<br>- 23 days after admission the trichina larvae disappeared from the CSF<br>Outcome: improvement |
| Dandy  | 1929 | 1   |    | Epileptic seizures                                                                                                                                                                                                                                     | N/A                                                                                           | N/A                                                  | The roentgenologic study revealed a calcific focus in the subrolandic area | -                                                                                                                                                                                                           |
| Stoll  | 1929 | 1 M | 21 | Diplopia<br>Left ptosis<br>Bilateral sixth nerve palsy                                                                                                                                                                                                 | Cells: 92 lymphocytes<br><i>Trichinae</i> : absent                                            | N/A                                                  | N/A                                                                        | Blood: eosinophilia                                                                                                                                                                                         |
|        |      | 1 M | 20 | Diplopia when he looked sideways                                                                                                                                                                                                                       | Cells: 90 lymphocytes<br><i>Trichinae</i> : absent                                            | N/A                                                  | N/A                                                                        | -                                                                                                                                                                                                           |
| Walker | 1932 | 1 M | 18 | Delirium<br>Neck stiffness<br>Paraparesis<br>Bilateral mydriasis, absent light reflex<br>Absent biceps and knee reflexes                                                                                                                               | Normal                                                                                        | Brain edema, engorged capillaries<br>Normal meninges | N/A                                                                        | Blood: leukocytosis with 97% polymorphonuclears ( <b>without</b> eosinophilia)<br>Outcome: death                                                                                                            |
|        |      | 1 F | 18 | Headache                                                                                                                                                                                                                                               | -                                                                                             | N/A                                                  | N/A                                                                        | Blood: leukocytosis with                                                                                                                                                                                    |

|          |      |     |    |                                                                                                                                                                                                                                                        |                                                                         |                                                                                                                                                                                                                                                                                                                                                                                                                                                                                                                                                                                                                                                                                                                                                                                                                                                                                                                                                                                                                                                                                                                                                               |     |                                                                                                                                                            |
|----------|------|-----|----|--------------------------------------------------------------------------------------------------------------------------------------------------------------------------------------------------------------------------------------------------------|-------------------------------------------------------------------------|---------------------------------------------------------------------------------------------------------------------------------------------------------------------------------------------------------------------------------------------------------------------------------------------------------------------------------------------------------------------------------------------------------------------------------------------------------------------------------------------------------------------------------------------------------------------------------------------------------------------------------------------------------------------------------------------------------------------------------------------------------------------------------------------------------------------------------------------------------------------------------------------------------------------------------------------------------------------------------------------------------------------------------------------------------------------------------------------------------------------------------------------------------------|-----|------------------------------------------------------------------------------------------------------------------------------------------------------------|
|          |      |     |    | Neck stiffness<br>Positive Kerning sign<br>Pupils: slow light reaction<br>Diminished tendon reflexes                                                                                                                                                   |                                                                         |                                                                                                                                                                                                                                                                                                                                                                                                                                                                                                                                                                                                                                                                                                                                                                                                                                                                                                                                                                                                                                                                                                                                                               |     | 97% polymorphonuclears (without eosinophilia)<br>Eosinophilia occurred only in convalescence.<br>Outcome: improvement<br>Associated: bacterial infection   |
| Filinski | 1932 | 1   |    | Right hemiplegia<br>Aphasia<br>Absence of deep and superficial reflexes.                                                                                                                                                                               | -                                                                       | Thrombosis of the superior sagittal sinus<br>Area of hemorrhagic softening in the left temporal lobe extending to the internal capsule<br>Larvae present in the brain                                                                                                                                                                                                                                                                                                                                                                                                                                                                                                                                                                                                                                                                                                                                                                                                                                                                                                                                                                                         | N/A | Outcome: death                                                                                                                                             |
| Pund     | 1934 | 1 M | 11 | Drowsiness, followed by delirium and coma<br>The pupillary reflex was a little sluggish<br>Hypertonia of the lower limbs, especially of the flexor groups, that he was unable to stand or walk.<br>Diminished or absent reflexes<br>Absent Kernig sign | Pressure: 6 mmHg<br>Clear<br>35 cells/mm <sup>3</sup><br>Pandy negative | Diffuse congestion of the brain<br>Sections from the cortex, basal ganglions, medulla and cerebellum - minute inflammatory foci comprising glial cells and a few plasma cells, lymphocytes and polymorphonuclears, with an occasional endothelial leukocyte<br>Very rarely - syncytial mass with five or six nuclei, which resembled the nuclei of the glial cells. In the center of many of these foci a granular wormlike parasite was seen, the embryo of the trichina. A few fragmented parasites<br>The foci were irregularly distributed in both the white and gray matter and sometimes were near a capillary. They were more numerous in the basal ganglions, medulla and cerebellum than in the cortex<br>The pia of the cortex and medulla - diffusely infiltrated with a few lymphocytes, plasma cells and polymorphonuclears, and a like infiltration occurred around and in the adventitia of the larger blood vessels of the cortex and of the basal ganglia. The infiltration of the vessels presented a tendency to be focal.<br>All of the blood vessels were engorged.<br>Many of the neurons in all sections - chromatolysis, pyknosis and | N/A | Associated: sickle-cell anemia.<br>Symptoms onset: 3 weeks after smallpox vaccination<br>Blood: leukocytosis <b>without</b> eosinophilia<br>Outcome: death |

|         |      |     |    |                                                                                                                                                                  |                                                                                                                                                            |                                                                                                                                                                                                                                                                                                                                                                                                                                                                                                                                                                                                                                                                                                                                                                                                                                                                                                                                                                                                                                                                                                                                                                                                           |     |                                                                                                                                                                                                                                    |
|---------|------|-----|----|------------------------------------------------------------------------------------------------------------------------------------------------------------------|------------------------------------------------------------------------------------------------------------------------------------------------------------|-----------------------------------------------------------------------------------------------------------------------------------------------------------------------------------------------------------------------------------------------------------------------------------------------------------------------------------------------------------------------------------------------------------------------------------------------------------------------------------------------------------------------------------------------------------------------------------------------------------------------------------------------------------------------------------------------------------------------------------------------------------------------------------------------------------------------------------------------------------------------------------------------------------------------------------------------------------------------------------------------------------------------------------------------------------------------------------------------------------------------------------------------------------------------------------------------------------|-----|------------------------------------------------------------------------------------------------------------------------------------------------------------------------------------------------------------------------------------|
|         |      |     |    |                                                                                                                                                                  |                                                                                                                                                            | sometimes neuronophagia.<br>Choroid plexus - normal                                                                                                                                                                                                                                                                                                                                                                                                                                                                                                                                                                                                                                                                                                                                                                                                                                                                                                                                                                                                                                                                                                                                                       |     |                                                                                                                                                                                                                                    |
| Gordon  | 1935 | 1 F | 14 | Apathy<br>Drowsiness<br>Delirium<br>Optic fundi - slightly congested<br>vessels without any alteration in<br>the discs<br>Ptosis of the left eye<br>Kerning sign | Pressure: normal<br>Clear<br>30 cells/field, 95%<br>lymphocytes, 5%<br>polymorphonuclears.<br>Albumin: one-plus;<br>Globulin: reduced<br>Glucose: reduced. | Cerebral congestion and edema.<br>Toxic encephalosis.<br>The dura was tense and slightly<br>congested.<br>The surface of the brain was<br>slightly edematous;<br>The large veins were congested;<br>Distinct increase in the finer arterial<br>subarachnoid ramification over the<br>gyri.<br>The brain was of normal firmness.<br>Multiple sections of the cerebrum<br>and cerebellum - a distinct<br>hyperemia of the gray matter, which<br>assumed a pink appearance<br>throughout.<br>The white matter - punctate<br>hyperemia of the severed small<br>vessels.<br>The spinal fluid - slightly increased<br>in amount<br><b>Microscopic:</b><br>Sections from parietal lobe - the<br>pial membrane was slightly<br>thickened with a sparse infiltration<br>of mononuclears and an occasional<br>macrophage.<br>Rarely - the cortical cells revealed<br>slight nuclear chromatolysis.<br>The Virchow-Robin spaces - slightly<br>widened.<br>The glia cells were slightly<br>increased in number; this was most<br>noticeable in the vicinity of the<br>capillaries.<br>All cortical capillaries were<br>immensely engorged and<br>prominent throughout.<br>Some interstitial edema in all<br>sections. | N/A | Absence of 3 generally<br>accepted diagnostic<br>criteria, gastrointestinal<br>symptoms, muscular<br>tenderness, and<br>eosinophilia until the day<br>preceding death.<br>Outcome: death – 19<br>days after the symptom's<br>onset |
| Spink   | 1935 | 1F  | 42 | Left facial palsy<br>Palatal reflex – absent<br>Right hemiplegia<br>Absent knee jerks<br>Babinski sign on the right                                              | Normal                                                                                                                                                     | N/A                                                                                                                                                                                                                                                                                                                                                                                                                                                                                                                                                                                                                                                                                                                                                                                                                                                                                                                                                                                                                                                                                                                                                                                                       | N/A | Blood: leukocytosis with<br>eosinophilia<br>Outcome: improvement                                                                                                                                                                   |
| Merritt | 1936 | 1 F | 17 | Neck stiffness<br>Confusion, delirium<br>Headache                                                                                                                | Pressure: increased<br>Clear, colorless<br>Cell free                                                                                                       | N/A                                                                                                                                                                                                                                                                                                                                                                                                                                                                                                                                                                                                                                                                                                                                                                                                                                                                                                                                                                                                                                                                                                                                                                                                       | N/A | Blood: leukocytosis with<br>eosinophilia<br>Outcome: improvement                                                                                                                                                                   |

|        |      |     |    |                                                                                                                                                                                                                                                                                                                                                                                                                                                                                                                                                                                                                      |                                                                             |                                                                                                                   |     |                                                                                    |
|--------|------|-----|----|----------------------------------------------------------------------------------------------------------------------------------------------------------------------------------------------------------------------------------------------------------------------------------------------------------------------------------------------------------------------------------------------------------------------------------------------------------------------------------------------------------------------------------------------------------------------------------------------------------------------|-----------------------------------------------------------------------------|-------------------------------------------------------------------------------------------------------------------|-----|------------------------------------------------------------------------------------|
|        |      |     |    | Spastic left hemiplegia<br>Flaccid paralysis of the muscles of the left shoulder girdle, apparently of a lower motor neuron type<br>Biceps and triceps reflexes - absent on the left side and normally active on the right.<br>The radial periosteal reflex was diminished on the left.<br>The knee and ankle jerks - hyperactive on both sides, but more so on the left.<br>Sustained ankle clonus on the left and an unsustained ankle clonus on the right.<br>Bilateral Babinski sign<br>Absent abdominal reflexes<br>Slight weakness of the left lateral gaze, impaired convergence and upward and downward gaze | Protein: 17 mg<br>Glucose: 54 mg<br>Absent trichinae                        |                                                                                                                   |     |                                                                                    |
| Blumer | 1926 | 1 M | 26 | Neck stiffness<br>Confusion<br>Drowsiness<br>Delirium<br>Coma<br>Numbness of the left arm and leg<br>Constant, slow, side-to-side movement of both eyes. Pupils: equal in size, moderately wide, but reacted poorly to light<br>Left hemiplegia<br>Brisk tendon reflexes<br>Bilateral ankle clonus                                                                                                                                                                                                                                                                                                                   | Cells:0<br>Glucose: increased<br>Globulin: increased<br>Trichinae larvae: + | N/A                                                                                                               | N/A | Blood: leukocytosis with eosinophilia<br>Outcome: improvement                      |
| Most   | 1937 | 1 F | 42 | Headache<br>Depression<br>Delirium<br>Unequal pupils, and reacting sluggishly to light and in accommodation<br>Left central facial palsy<br>Left upper limb paresis<br>Tendon reflexes brisker on the left<br>Left Babinski sign                                                                                                                                                                                                                                                                                                                                                                                     | Clear<br>Normal pressure<br>No globulin or cells<br>Absent Trichinella      | N/A                                                                                                               | N/A | Blood: leukocytosis with eosinophilia<br>Outcome: improvement                      |
|        |      | 1 M | 48 | Disorientation<br>Impaired memory, especially for more recent events, with a tendency to confabulate.                                                                                                                                                                                                                                                                                                                                                                                                                                                                                                                | No globulin or cells<br>Absent Trichinella                                  | <b>Macroscopic:</b> normal<br><b>Microscopic:</b><br>Granulomatous nodules that appeared as isolated and discrete | N/A | Blood: leukocytosis without eosinophilia<br>Outcome: death<br>Associated diseases: |



Lack of inside  
Acalculia  
Mild anisocoria, but pupils  
reacted promptly to light and in  
accommodation  
Absent biceps reflexes  
Absent tendon reflex  
in the lower extremities  
Tetraparesis

lesions scattered throughout the  
brain substance. They occurred  
most frequently in the subcortical  
white substance, especially in  
the areas subjacent to the cortex,  
quite commonly in the deeper  
layers of all parts of the cortex, only  
in scattered areas in the basal  
ganglia, midbrain and pons and  
rarely in the cerebellum, spinal cord  
and more superficial layers  
Appearance of the parasite in the  
parenchyma of the brain  
Evidence of pathologic alterations  
in and around the blood vessels  
Perivascular infiltrations situated  
especially in the cortex, the  
adjacent subcortex and the basal  
ganglia. These changes were noted  
around the veins, as well as the  
smaller and larger arterioles. The  
perivascular infiltrations varied from  
a few accumulated cells in the  
Virchow-Robin spaces to dense  
accumulations many layers deep.  
The cells were almost always  
limited to these spaces and did not  
infiltrate the parenchyma.  
No eosinophils were observed.  
Only rarely was a parasite  
observed in the infiltrating elements  
around the vessels.  
Generalized engorgement and  
hyperemia of blood vessels  
Extreme engorgement of vessels  
just below the ependymal layer  
Fragmented erythrocytes and  
pigment in the parenchyma in the  
vicinity of the vessels  
Many vessels, especially in the  
white substance immediately  
below the cortex, had edematous  
spaces around them. The  
parenchyma adjacent to some of  
the larger vessels, especially in the  
midbrain, showed a limited area of  
vacuolation and had a racemose  
appearance.  
The architectonics of the cortex  
was disturbed only in the regions

syphilis and chronic  
alcoholism

where there were unusually diffuse infiltrations of cells  
 Numerous round and oval cavities were diffusely distributed in the subcortical white substance and in the midbrain (état criblé)  
 No trichinas in the meninges  
 The veins and arteries of the pia-arachnoid were hyperemic and increased in number, especially in the infiltrated regions.

|         |      |     |    |                                                                                                                                                                                                                                                                                                                                                                                                                                                |                                                                                                                         |                                                                                                                                                                          |     |                                                               |
|---------|------|-----|----|------------------------------------------------------------------------------------------------------------------------------------------------------------------------------------------------------------------------------------------------------------------------------------------------------------------------------------------------------------------------------------------------------------------------------------------------|-------------------------------------------------------------------------------------------------------------------------|--------------------------------------------------------------------------------------------------------------------------------------------------------------------------|-----|---------------------------------------------------------------|
| Evers   | 1939 | 1 M | 25 | Drowsiness, followed by coma<br>Dilated pupils with sluggish reaction to light.<br>Transient divergent strabismus.<br>Optic fundi:<br>- right eye – edema of the disk and the surrounding retina, with exudate, slight perivascular change along the superior temporal vein.<br>- left eye mild edema of the disk and of the surrounding retina<br>Increased muscular tone in upper limbs<br>Bilateral ankle clonus<br>Bilateral Babinski sign | Pressure: normal<br>Clear<br>10 lymphocytes / mm <sup>3</sup><br>Proteins: absent<br>Glucose: normal<br>Motile larvae + | N/A                                                                                                                                                                      | N/A | Blood: leukocytosis with eosinophilia<br>Outcome: improvement |
| Huston  | 1941 | 1 M | 19 | Drowsiness<br>Somnolence<br>Left arm spastic<br>Brisk knee and ankle jerks<br>Bilateral ankle-clonus<br>Bilateral Babinski sign.                                                                                                                                                                                                                                                                                                               | Normal                                                                                                                  | N/A                                                                                                                                                                      | N/A | Blood: leukocytosis with eosinophilia<br>Outcome: improvement |
|         |      | 1 F | 69 | Drowsiness<br>Delirium<br>Frequent crying<br>Loss of tone in facial muscles<br>Flaccid arms with no voluntary movement or power<br>Biceps jerks present on both sides; supinator and triceps jerk absent<br>Both legs flaccid, particularly right<br>Knee and ankle jerks present<br>Bilateral Babinski sign                                                                                                                                   | Normal                                                                                                                  | Sections of frontal, parietal, temporal and occipital cortex, centrum semi-ovale, basal ganglia, pons, medulla and cerebellum show neither larvae nor inflammatory foci. | N/A | Blood: leukocytosis with eosinophilia<br>Outcome: death       |
| Sheldon | 1941 | 1 M |    | The patient lied curled up in                                                                                                                                                                                                                                                                                                                                                                                                                  | Normal or reduced                                                                                                       | N/A                                                                                                                                                                      |     | Outcome: improvement                                          |

|           |      |     |    |                                                                                                                                                                                                                                                                                   |                                                                                                                             |     |     |                                                                                                          |
|-----------|------|-----|----|-----------------------------------------------------------------------------------------------------------------------------------------------------------------------------------------------------------------------------------------------------------------------------------|-----------------------------------------------------------------------------------------------------------------------------|-----|-----|----------------------------------------------------------------------------------------------------------|
|           |      |     |    | bed, with retracted head,<br>photophobia and a piercing<br>meningeal cry<br>Impaired consciousness<br>Irritability<br>Positive Kernig sign<br>Bilateral Babinski sign                                                                                                             | pressure<br>Normal findings                                                                                                 |     |     |                                                                                                          |
|           |      | 1   |    | Encephalitis clinical signs                                                                                                                                                                                                                                                       |                                                                                                                             |     |     |                                                                                                          |
|           |      | 1   |    | Depression                                                                                                                                                                                                                                                                        |                                                                                                                             |     |     |                                                                                                          |
|           |      | 1 F |    | Cerebellar symptoms<br>Typical decubitus of encephalitis<br>lethargica, but without the ocular<br>palsies<br>Lethargy – for a time the patient<br>is indifferent to the surroundings,<br>and in particular resent mental<br>effort, such as answering<br>questions.<br>Sleepiness |                                                                                                                             |     |     |                                                                                                          |
|           |      | 3   |    | Focal brain damage – unilateral<br>cerebellar signs                                                                                                                                                                                                                               |                                                                                                                             |     |     |                                                                                                          |
| Wyrens    | 1941 | 1   |    | Right hemiparesis                                                                                                                                                                                                                                                                 | -                                                                                                                           | N/A | N/A | Eosinophilia<br>Outcome: improvement                                                                     |
| Campbell  | 1947 | 1 M | 30 | Left hemiparesis<br>Ataxia<br>Psychosis<br>Delirium                                                                                                                                                                                                                               | Normal                                                                                                                      | N/A | N/A | Outcome: improvement                                                                                     |
| Battle    | 1948 | 1 F | 3  | Right hemiplegia                                                                                                                                                                                                                                                                  | Normal                                                                                                                      | N/A | N/A | Outcome: improvement                                                                                     |
| MacAndrew | 1948 | 1 F | 39 | Slowed mentation<br>Depression<br>Right central facial palsy<br>Right footdrop<br>Sensory loss with L4-L5-S1<br>Diminished right ankle and knee<br>jerks<br>Absent Babinski sign                                                                                                  | Normal                                                                                                                      | N/A | N/A | Blood: leukocytosis with<br>eosinophilia<br>Subungual " splinter"<br>hemorrhages<br>Outcome: improvement |
| Skinner   | 1948 | 1 F | 60 | Neck stiffness<br>Apathy<br>Confusion<br>Drowsiness<br>Left flaccid hemiparesis<br>Right Babinski sign                                                                                                                                                                            | Pressure: 110 mm H2O<br>Xanthochromia<br>Cells: red blood cells –<br>700/mm <sup>3</sup><br>Protein: 11mg<br>Glucose normal | N/A | N/A | Blood: leukocytosis with<br>eosinophilia<br>Outcome: improvement                                         |
|           |      | 1 M | 40 | Agitation<br>Anxiety<br>Disorientation<br>Delirium<br>Left hemiparesis<br>Left Babinski sign<br>Tendon reflexes: brisk knee and<br>ankle jerks                                                                                                                                    | Normal                                                                                                                      | N/A | N/A | Blood: leukocytosis with<br>eosinophilia<br>Outcome: improvement                                         |

|              |      |     |    |                                                                                                                                                                                                                                                                      |                                                                                                       |                                 |     |                                                                                                           |
|--------------|------|-----|----|----------------------------------------------------------------------------------------------------------------------------------------------------------------------------------------------------------------------------------------------------------------------|-------------------------------------------------------------------------------------------------------|---------------------------------|-----|-----------------------------------------------------------------------------------------------------------|
|              |      |     |    | Impaired position sense in the left body                                                                                                                                                                                                                             |                                                                                                       |                                 |     |                                                                                                           |
| Bruno        | 1950 | 1 M | 16 | Neck stiffness<br>Delirium                                                                                                                                                                                                                                           | Normal                                                                                                | N/A                             | N/A | Outcome: improvement                                                                                      |
| McCabe       | 1951 | 1 F | 19 | Disorientation<br>Neck stiffness<br>Pupils: dilated but equal and reacted sluggishly to light and in accommodation                                                                                                                                                   | Pressure: 110 mm H2O<br>Clear<br>Trichinella absent<br>Cells: 0<br>Protein: normal<br>Glucose: normal | N/A                             | N/A | Blood: leukocytosis <b>without</b> eosinophilia<br>Outcome: death                                         |
|              |      | 1 M | 40 | Auditory and visual hallucinations with paranoid grandiose and persecutory delusions<br>Oriented in all spheres,<br>Emotional blunting and dissociation                                                                                                              | Normal                                                                                                | N/A                             | N/A | Blood: leukocytosis with eosinophilia<br>Outcome: improvement                                             |
| Davis        | 1951 |     |    | Agitation<br>Confusion<br>Disorientation                                                                                                                                                                                                                             | Normal<br>Trichinella larvae absent                                                                   | N/A                             | N/A | Blood: leukocytosis with eosinophilia<br>Outcome: improvement                                             |
| Helfand      | 1952 | 1 F | 33 | Headache<br>Paraparesis<br>Visual loss                                                                                                                                                                                                                               | 103 white blood cells                                                                                 | N/A                             | N/A | Outcome: improvement                                                                                      |
| Brimblecombe | 1952 | 1 M | 5  | Seizures: petit mal, grand mal                                                                                                                                                                                                                                       | Normal                                                                                                | -                               | N/A | No eosinophilia                                                                                           |
| Scott        | 1952 | 1 M | 28 | Neck stiffness<br>Disorientation<br>Confusion                                                                                                                                                                                                                        | Clear<br>Pressure: 225mm H2O<br>Protein: normal<br>2 red cells                                        | N/A                             | N/A | Blood: leukocytosis with eosinophilia<br>Outcome: improvement                                             |
|              |      | 1 M | 26 | Headache<br>Confusion<br>Stupor<br>Brisk tendon reflexes<br>Bilateral ankle clonus<br>Bilateral Babinski sign                                                                                                                                                        | Clear<br>Protein: normal<br>3 lymphocytes                                                             | N/A                             | N/A | Blood: leukocytosis with eosinophilia<br>EEG: paroxysmal 5-6/sec wave bilaterally<br>Outcome: improvement |
|              |      | 1 M | 33 | Headache<br>Episode of consciousness loss<br>Somnolence<br>Meningeal signs<br>Eyes deviated to the right<br>Left central facial palsy<br>Tetraparesis (left > right)<br>Spasticity (left > right)<br>Brisk tendon reflexes (left > right)<br>Bilateral Babinski sign | Clear<br>Pressure: 180 mm H2O<br>Protein: normal<br>No cells                                          | N/A                             | N/A | Blood: leukocytosis with eosinophilia<br>Outcome: improvement                                             |
| Hurd         | 1953 | 1 M | 40 | Neck stiffness<br>Confusion<br>Impaired recent memory<br>Right hemiparesis<br>Diminished knee and ankle jerks                                                                                                                                                        | Normal pressure<br>Normal proteins and glucose<br>4 lymphocytes                                       | Head Rx: without calcifications | N/A | Blood: leukocytosis without initial eosinophilia.<br>Eosinophilia appeared after leucocytes               |

|          |      |     |    |                                                                                                                                                                                                                                                                                                                                     |                                                                                                                                                         |                            |     |                                                                                                                                                                                                                                  |
|----------|------|-----|----|-------------------------------------------------------------------------------------------------------------------------------------------------------------------------------------------------------------------------------------------------------------------------------------------------------------------------------------|---------------------------------------------------------------------------------------------------------------------------------------------------------|----------------------------|-----|----------------------------------------------------------------------------------------------------------------------------------------------------------------------------------------------------------------------------------|
|          |      |     |    | Right Babinski sign                                                                                                                                                                                                                                                                                                                 |                                                                                                                                                         |                            |     | decreased<br>Outcome: improvement                                                                                                                                                                                                |
| Roehm    | 1953 | 1 M | 34 | Amnesia, mainly for recent memories (past 3 weeks), but no confabulation<br>Impaired ability to learn new things<br>Disorientation<br>Tetraparesis<br>Radial neuritis<br>Insomnia with agitation                                                                                                                                    | Pressure 180 mm<br>Protein, 52 mg/dl<br>Negative mastic<br>Cells: normal                                                                                | N/A                        | N/A | Blood: leukocytosis without initial eosinophilia<br>EEG: mild irregularities, no cortical dysfunction<br>Outcome: improvement                                                                                                    |
| Semple   | 1954 | 1   |    | Cerebellar signs<br>Monoplegia                                                                                                                                                                                                                                                                                                      | Normal                                                                                                                                                  | N/A                        | N/A | Outcome: improvement                                                                                                                                                                                                             |
|          |      | 1   |    | Coma<br>Meningeal position and cry                                                                                                                                                                                                                                                                                                  | Normal                                                                                                                                                  | N/A                        | N/A | Outcome: improvement                                                                                                                                                                                                             |
|          |      | 1   |    | Semi-comatose                                                                                                                                                                                                                                                                                                                       | Normal                                                                                                                                                  | N/A                        | N/A | Outcome: improvement                                                                                                                                                                                                             |
|          |      | 1   |    | Semi-comatose<br>Monoplegia                                                                                                                                                                                                                                                                                                         | Normal                                                                                                                                                  | N/A                        | N/A | Outcome: improvement                                                                                                                                                                                                             |
|          |      | 9   |    | Minor psychic disturbances, with either delusions or an obvious personality change.<br>The personality changes mainly took the form of the patient behaving in an unusual manner.<br>One sang constantly; another climbed out of bed and calmly urinated on the floor.<br>Hallucinations and visual disturbances were not reported. | -                                                                                                                                                       | N/A                        | N/A | Outcome: improvement                                                                                                                                                                                                             |
| Freedman | 1954 | 1 F | 47 | Headache<br>Personality changes<br>Depression<br>Apathy<br>Disorientation<br>Neck stiffness<br>Diminished knee and ankle jerks<br>Right arm weakness<br>Cerebellar signs                                                                                                                                                            | Pressure: 125 mm.<br>Negative white cells<br>Red cells: many<br>Proteins: 620 mg%<br>Glucose: 91 mg% Larvae of Trichinella spiralis - not searched for. | N/A                        | N/A | Blood: leukocytosis with eosinophilia<br>Associated: bacterial urinary infection<br>Outcome: improvement                                                                                                                         |
| Marcus   | 1955 | 1 M | 30 | Dysphagia (as seen in bulbar or pseudobulbar disease)<br>Tetraparesis<br>Diminished tendon reflexes<br>Right Babinski sign                                                                                                                                                                                                          | Normal pressure<br>Clear<br>Glucose: 70 mg/dl<br>Protein: 18 mg/dl                                                                                      | N/A                        | N/A | Blood: leukocytosis <b>without</b> eosinophilia; only on one occasion eosinophilia was present (12%)<br>Associated: bacterial urinary infection<br>EMG: severe and widespread lower motor neuron changes<br>Outcome: improvement |
| Kershaw  | 1956 | 1 F |    | Dizziness                                                                                                                                                                                                                                                                                                                           | -                                                                                                                                                       | Absent Larvae in the brain | N/A |                                                                                                                                                                                                                                  |

|          |      |     |    |                                                                                                                                                                                                                                          |                                                                                                           |                                                                                                                                                                                                                                                                                                                                                            |                     |                                                                                                                                                                                                     |
|----------|------|-----|----|------------------------------------------------------------------------------------------------------------------------------------------------------------------------------------------------------------------------------------------|-----------------------------------------------------------------------------------------------------------|------------------------------------------------------------------------------------------------------------------------------------------------------------------------------------------------------------------------------------------------------------------------------------------------------------------------------------------------------------|---------------------|-----------------------------------------------------------------------------------------------------------------------------------------------------------------------------------------------------|
|          |      |     |    | Insomnia                                                                                                                                                                                                                                 |                                                                                                           |                                                                                                                                                                                                                                                                                                                                                            |                     |                                                                                                                                                                                                     |
|          |      | 1 F |    | Cerebellar symptoms<br>Hemiplegia                                                                                                                                                                                                        | -                                                                                                         |                                                                                                                                                                                                                                                                                                                                                            |                     |                                                                                                                                                                                                     |
|          |      | 1 F |    | Dizziness<br>Lethargy<br>Anxiety<br>Weakness of hands                                                                                                                                                                                    | -                                                                                                         |                                                                                                                                                                                                                                                                                                                                                            |                     |                                                                                                                                                                                                     |
| Leitner  | 1956 | 1 M | 51 | Stupor<br>Somnolence                                                                                                                                                                                                                     | Normal                                                                                                    | N/A                                                                                                                                                                                                                                                                                                                                                        | N/A                 | Outcome: improvement                                                                                                                                                                                |
|          |      | 1 M | 42 | Neck stiffness<br>Somnolence                                                                                                                                                                                                             | -                                                                                                         | N/A                                                                                                                                                                                                                                                                                                                                                        | N/A                 | Outcome: improvement                                                                                                                                                                                |
| Snape    | 1956 | 1 F | 22 | Psychosis<br>Hallucinations                                                                                                                                                                                                              | Normal                                                                                                    | N/A                                                                                                                                                                                                                                                                                                                                                        | N/A                 | Outcome: improvement                                                                                                                                                                                |
| Guattery | 1956 | 1 F | 18 | Delirium                                                                                                                                                                                                                                 | -                                                                                                         | Encephalitis                                                                                                                                                                                                                                                                                                                                               | N/A                 | Blood: leukocytosis<br>Outcome: death                                                                                                                                                               |
| Meltzer  | 1957 | 1 M | 43 | Headache<br>Confusion<br>Disorientation<br>Lethargy<br>Pupils – equal, slow light reaction<br>Motor aphasia<br>Left wrist drop<br>Tendon reflexes left > right<br>Bilateral Babinski sign                                                | Pressure: 110 mm<br>Clear<br>Cells: 0<br>Glucose: normal<br>Protein: 19 mg/100 cc                         | N/A                                                                                                                                                                                                                                                                                                                                                        | Skull X-Ray: normal | Blood: leukocytosis with eosinophilia<br>Outcome: recovery                                                                                                                                          |
| Terplan  | 1957 | 1 B | 8  | Lethargy                                                                                                                                                                                                                                 | Cells: 755<br>Protein: 466 mg.                                                                            | <b>Macroscopic:</b> uniform swelling of both cerebral hemispheres and of the cerebellum, with compression of the fourth ventricle and protrusion of the tonsils into the foramen magnum.<br><b>Microscopic:</b> dense inflammatory reaction in the cerebellum, predominantly eosinophilic; an occasional free trichinella larva was found in the thalamus. | N/A                 | Outcome: death                                                                                                                                                                                      |
| Chase    | 1957 | 1 M | 27 | Headache<br>Psychomotor epileptic seizures<br>Dysphagia<br>Tetraparesis<br>Diminished tendon reflexes with absent knee reflexes                                                                                                          | Clear<br>Protein: 28 mg/dl<br>Glucose: 100 mg/dl                                                          | -                                                                                                                                                                                                                                                                                                                                                          | N/A                 | Blood: leukocytosis with eosinophilia<br>Outcome: death                                                                                                                                             |
| Mavor    | 1958 | 1 F | 23 | Headache<br>Lethargy<br>Impaired serial subtractions<br>Optic fundi: engorgement of veins, blurring of the disc margins with hyperemia and radial striations; bilateral swelling of the optic disc<br>Flaccid paresis of left upper limb | Pressure: 140 mm H <sub>2</sub> O<br>Clear<br>Cells: 1 red, 4 white /mm <sup>3</sup><br>Protein: 31 mg/dl | N/A                                                                                                                                                                                                                                                                                                                                                        | Skull X-ray: normal | Blood: leukocytosis with eosinophilia<br>EEG: medium-voltage, arrhythmic activity in all areas, 4-15/sec, intermittent high-voltage 2/sec rhythmic discharges in the left frontal pole, with spread |

|            |      |     |    |                                                                                                                                                                                                                                                                                                                                                                                                                                                                                                                                                                                           |                                                                                                                                     |     |                                 |                                                                                                                                                        |
|------------|------|-----|----|-------------------------------------------------------------------------------------------------------------------------------------------------------------------------------------------------------------------------------------------------------------------------------------------------------------------------------------------------------------------------------------------------------------------------------------------------------------------------------------------------------------------------------------------------------------------------------------------|-------------------------------------------------------------------------------------------------------------------------------------|-----|---------------------------------|--------------------------------------------------------------------------------------------------------------------------------------------------------|
|            |      |     |    | Bilateral brisk tendon reflexes<br>(left > right)<br>Bilateral ankle clonus<br>Absent Babinski sign                                                                                                                                                                                                                                                                                                                                                                                                                                                                                       |                                                                                                                                     |     |                                 | to the midline and right<br>areas<br>Outcome: improvement                                                                                              |
| Levine     | 1958 | 1 F | 26 | Headache<br>Delirium<br>Right hemiparesis                                                                                                                                                                                                                                                                                                                                                                                                                                                                                                                                                 | Normal                                                                                                                              | N/A | N/A                             | Outcome: improvement                                                                                                                                   |
| Greenstein | 1958 | 1 M | 6  | Neck stiffness<br>Generalized clonic convulsions<br>Stupor<br>Kerning sign positive<br>Bilateral Babinski sign                                                                                                                                                                                                                                                                                                                                                                                                                                                                            | Pressure: 260 mm H2O<br>Clear<br>Cells: lymphocytes; Pandy<br>test negative<br>Protein: 24 mg/100 ml<br>Negative cultures           | N/A | N/A                             | Blood: leukocytosis with<br>mild eosinophilia<br>Associated diseases:<br>febrile convulsions,<br>retardation of<br>development<br>Outcome: improvement |
| Dalessio   | 1961 | 1 F | 45 | Headache<br>Blurring of vision<br>Right upper limb paresis with<br>paresthesia followed by<br>tetraparesis<br>Lethargy<br>Coma<br>Generalized hyporeflexia<br>Bilateral Babinski sign<br>Irritability<br>Insomnia<br>Amnesia for recent events                                                                                                                                                                                                                                                                                                                                            | Pressure: normal<br>Protein: normal<br>Glucose: normal<br>Red blood cells: 50                                                       | N/A | N/A                             | Blood: leukocytosis with<br>eosinophilia<br>Splinter hemorrhages<br>in her fingernail beds.<br>EEG: diffuse<br>abnormalities<br>Outcome: improvement   |
| Grey       | 1962 | 1 M | 28 | Headache<br>Neck stiffness<br>Disorientation<br>Lethargy<br>Apathy<br>Uncontrolled bouts of crying<br>Photophobia<br>Transitory diplopia<br>Ptosis of the left eyelid<br>Scintillating scotomata<br>Positive Romberg sign<br>Ataxia (particularly in the right<br>arm and left lower limb)<br>Paresthesia and weakness of left<br>lower limb<br>Left hemiparesis<br>Spasticity of left lower limb<br>Jerky, rhythmic movements of<br>the left foot<br>Involuntary movements of the<br>upper extremities<br>(hemiballismus)<br>Brisk lower limbs tendon reflexes<br>Bilateral ankle clonus | Pressure: 120 mm H2O<br>Clear<br>Cells: 4 white blood cells<br>Protein 27 mg/100 ml,<br>Glucose: 70 mg/100 ml<br>Absent Trichinella | N/A | Skull roentgenograms:<br>normal | Blood: leukocytosis with<br>eosinophilia<br>Splinter hemorrhages<br>beneath nails<br>Outcome: improvement                                              |

|       |      |     |    |                                                                                                                                                                                                                                                                                                                                                            |                                                                                         |     |                               |                                                                                                                                                                                                                                                                                                                              |
|-------|------|-----|----|------------------------------------------------------------------------------------------------------------------------------------------------------------------------------------------------------------------------------------------------------------------------------------------------------------------------------------------------------------|-----------------------------------------------------------------------------------------|-----|-------------------------------|------------------------------------------------------------------------------------------------------------------------------------------------------------------------------------------------------------------------------------------------------------------------------------------------------------------------------|
|       |      |     |    | Bilateral Babinski sign                                                                                                                                                                                                                                                                                                                                    |                                                                                         |     |                               |                                                                                                                                                                                                                                                                                                                              |
|       | 1 M  | 42  |    | Neck stiffness<br>Change in personality<br>Lethargy<br>Emotional lability<br>Insomnia<br>Apprehension.<br>Short period of blurred vision and<br>scintillating scotomata<br>Nystagmus on left lateral gaze<br>Positive Romberg sign<br>Dysmetria<br>in left upper limb<br>Left hemiparesis<br>Brisk tendon reflexes in lower<br>limbs<br>Left Babinski sign | Pressure 160 mm<br>Clear<br>Cells: 0<br>Protein: 19 mg/100 ml.                          | N/A | N/A                           | Blood: leukocytosis with<br>eosinophilia<br>Splinter hemorrhages<br>Associated disease:<br>Entamoeba histolytica<br>(demonstrable in<br>random stool specimens)<br>Outcome: improvement                                                                                                                                      |
|       | 1 M  | 34  |    | Headache<br>Lethargy<br>Disorientation<br>Weakness of the left arm<br>Brisk tendon reflexes on the left<br>side<br>Left ankle clonus<br>Left Babinski sign                                                                                                                                                                                                 | Pressure 140 mm<br>Clear<br>Cells: 6 mononuclear<br>cells/mm3<br>Protein: 30 mg/100 ml. | N/A | N/A                           | Blood: leukocytosis with<br>eosinophilia<br>Outcome: improvement                                                                                                                                                                                                                                                             |
| Perot | 1963 | 1 F | 42 | Drowsiness<br>Memory impairment<br>Bizarre mental attitude<br>The present illness precipitated a<br>mental breakdown in a<br>predisposed patient.                                                                                                                                                                                                          | N/A                                                                                     | N/A | N/A                           | Blood: leukocytosis with<br>eosinophilia<br>Associated diseases:<br>schizophrenia<br>EEG: diffuse and<br>moderately severe<br>disturbance involving<br>cortical and subcortical<br>structures<br>Outcome: improvement                                                                                                        |
|       | 1 F  | 36  |    | Headache<br>Drowsiness<br>Confusion<br>Delirium<br>Left hemiparesis<br>Bilateral equivocal Babinski sign<br>Right hemianopsia<br>Motor aphasia<br>Apraxia                                                                                                                                                                                                  | N/A                                                                                     | N/A | N/A                           | Blood: leukocytosis with<br>eosinophilia<br>EEG: marked cerebral<br>disturbance involving<br>both cortical and<br>subcortical structures<br>with some evidence for a<br>projected abnormality<br>involving the left side<br>more than the right.<br>Associated: acute pelvic<br>inflammatory disease<br>Outcome: improvement |
|       | 1 M  | 13  |    | Episode of memory loss, lasting<br>several hours<br>Impaired memory for recent                                                                                                                                                                                                                                                                             | Pressure: 155 mm H2O<br>Clear<br>2 lymphocytes                                          | N/A | Skull Roentgenology<br>normal | Blood: leukocytosis with<br>eosinophilia<br>EEG: mild bilateral                                                                                                                                                                                                                                                              |



|          |      |     |    |                                                                                                                                                                                                                                                                                                                                                                            |                                                                            |     |                     |                                                                                                                                                  |
|----------|------|-----|----|----------------------------------------------------------------------------------------------------------------------------------------------------------------------------------------------------------------------------------------------------------------------------------------------------------------------------------------------------------------------------|----------------------------------------------------------------------------|-----|---------------------|--------------------------------------------------------------------------------------------------------------------------------------------------|
|          |      |     |    | events<br>"Staring spells"<br>The patient said that things happened as if "in a dream."<br>Apathy<br>Depression<br>Bizarre behavior<br>Somnolence<br>Episodes of bizarre behavior after initial illness                                                                                                                                                                    | Protein 12 mg/dl.<br>Glucose 63 mg/dl<br>Absent Trichinella                |     |                     | abnormal activity mainly from the parieto-occipital and temporal regions<br>Outcome: improvement                                                 |
| Barr     | 1966 | 1 F | 32 | Lethargy<br>Confusion<br>Dizziness                                                                                                                                                                                                                                                                                                                                         | Normal                                                                     | N/A | N/A                 | Blood: leukocytosis with eosinophilia<br>EEG: diffuse anterior brain-stem disturbance.<br>Subungual splinter hemorrhages<br>Outcome: improvement |
|          |      | 1 F | 46 | Headache<br>Severe paranoid reaction<br>Optic fundi: retinal vein congestion.<br>Bilateral sixth nerve palsy                                                                                                                                                                                                                                                               | Normal                                                                     | N/A | N/A                 | Blood: leukocytosis with eosinophilia<br>Outcome: improvement                                                                                    |
| Kennedy  | 1966 | 1 F | 39 | Headache<br>Confusion<br>Irritability<br>Left central facial palsy<br>Left hemiplegia<br>Generalized hypertonia<br>Left Babinski sign                                                                                                                                                                                                                                      | Normal                                                                     | N/A | N/A                 | Blood: leukocytosis with eosinophilia<br>Outcome: improvement                                                                                    |
| Corridan | 1969 | 6   |    | Memory loss                                                                                                                                                                                                                                                                                                                                                                | -                                                                          | N/A | N/A                 | -                                                                                                                                                |
|          |      | 1   |    | Facial paralysis                                                                                                                                                                                                                                                                                                                                                           | -                                                                          | N/A | N/A                 | -                                                                                                                                                |
|          |      | 1   |    | Hemiplegia                                                                                                                                                                                                                                                                                                                                                                 | -                                                                          | N/A | N/A                 | -                                                                                                                                                |
|          |      | 1   |    | Delirium                                                                                                                                                                                                                                                                                                                                                                   | -                                                                          | N/A | N/A                 | -                                                                                                                                                |
| Kramer   | 1972 | 1 F | 17 | Impaired abstract thinking<br>Acalculia<br>Episodes of anosognosia<br>Dizziness<br>Left lateral rectus palsy (six <sup>th</sup> cranial nerve)<br>Left central facial palsy<br>Left hemiparesis<br>Pain and paresthesia over the left side of the body<br>Brisk tendon reflexes (left > right)<br>Left sustained ankle clonus<br>Babinski sign – left plantar indifference | Normal                                                                     | N/A | Skull X-Ray: normal | Blood: leukocytosis with eosinophilia<br>EEG: diffusely abnormal<br>Splinter hemorrhages under the nails<br>Outcome: improvement                 |
| Davis    | 1976 | 1 M | 26 | Optic fundi: Numerous punctate and splinter retinal hemorrhages in both eyes                                                                                                                                                                                                                                                                                               | Slightly traumatic<br>Red blood cells: 10,300<br>White blood cells: 24 (21 | N/A | N/A                 | Blood: leukocytosis with eosinophilia<br>Outcome: improvement                                                                                    |

|           |      |     |    |                                                                                                                                                                                                                                                                                                  |                                                                                         |                                                                                                                                                                                                                                                                                                                                                                                                                                                                                                                                                                                                                           |                                                                                                                                                                                                  |                                                                                                               |
|-----------|------|-----|----|--------------------------------------------------------------------------------------------------------------------------------------------------------------------------------------------------------------------------------------------------------------------------------------------------|-----------------------------------------------------------------------------------------|---------------------------------------------------------------------------------------------------------------------------------------------------------------------------------------------------------------------------------------------------------------------------------------------------------------------------------------------------------------------------------------------------------------------------------------------------------------------------------------------------------------------------------------------------------------------------------------------------------------------------|--------------------------------------------------------------------------------------------------------------------------------------------------------------------------------------------------|---------------------------------------------------------------------------------------------------------------|
|           |      |     |    | Bilateral sixth cranial nerve palsy<br>Absent tendon reflexes<br>Muscular hypotonia                                                                                                                                                                                                              | polymorphonuclear leukocytes, 3 lymphocytes)<br>Protein: 11.3 mg/dl<br>Glucose 52 mg/dl |                                                                                                                                                                                                                                                                                                                                                                                                                                                                                                                                                                                                                           |                                                                                                                                                                                                  |                                                                                                               |
| Gross     | 1979 | 1 F | 35 | Mental slowness<br>Depression<br>Change in perception of auditory and visual images and some impairment of thought processes<br>Confusion<br>Optic fundi: multiple bilateral flame-shaped retinal hemorrhages, without vitreous extension<br>Mild bilateral ptosis<br>Diminished tendon reflexes | -                                                                                       | N/A                                                                                                                                                                                                                                                                                                                                                                                                                                                                                                                                                                                                                       | N/A                                                                                                                                                                                              | Blood: absence of significant eosinophilia until three to four weeks into the illness<br>Outcome: improvement |
| Evans     | 1982 | 1 M | 46 | Headache<br>Optic fundi: papilledema<br>Generalized tonic-clonic seizures                                                                                                                                                                                                                        | Pressure of 300 mm H2O                                                                  | N/A                                                                                                                                                                                                                                                                                                                                                                                                                                                                                                                                                                                                                       | Brain CT scan: hypodense area with some contrast enhancement compatible with an acute infarction in the area of the left sylvian fissure<br>Angiogram: thrombosis of the superior sagittal sinus | Blood: leukocytosis with eosinophilia<br>Outcome: improvement                                                 |
| Froscher  | 1982 | 1 M |    | Psycho-motor epileptic seizures                                                                                                                                                                                                                                                                  | -                                                                                       | -                                                                                                                                                                                                                                                                                                                                                                                                                                                                                                                                                                                                                         | -                                                                                                                                                                                                | -                                                                                                             |
| Gay       | 1982 | 1 F | 50 | Headache<br>Coma<br>Photophobia<br>Seizures<br>Flaccid left upper limb paresis<br>Signs of brainstem compression                                                                                                                                                                                 | Trichinella larvae: -                                                                   | <b>Macroscopic:</b> Cerebral edema, causing uncal and cerebellar herniation and necrosis. The cortical venous system and dural sinuses were extensively thrombosed.<br>In the brain substance were areas of hemorrhage and infarction in a pattern resulting from venous occlusions<br><b>Microscopic:</b><br>No signs of vasculitis<br>Mild meningitis of lymphocytes and eosinophils, including involvement of Virchow-Robin spaces.<br>In cortical areas not included in the regions of infarction and hemorrhage were small foci of necrosis, infrequently in the form of linear clefts<br>Trichinella larvae: absent | Serial brain CT: enlarging areas of right parietal hemorrhage.                                                                                                                                   | Blood: leukocytosis with eosinophilia<br>Outcome: death                                                       |
| Lyon-Caen | 1982 | 1   |    | Behavioural disorders                                                                                                                                                                                                                                                                            | -                                                                                       | N/A                                                                                                                                                                                                                                                                                                                                                                                                                                                                                                                                                                                                                       | Brain CT: transient low-                                                                                                                                                                         | Outcome: improvement                                                                                          |

|         |      |     |    |                                                                                                                               |                                                                                                           |     |                                                                                                                                                                                                                                          |                                                                                                                                                  |
|---------|------|-----|----|-------------------------------------------------------------------------------------------------------------------------------|-----------------------------------------------------------------------------------------------------------|-----|------------------------------------------------------------------------------------------------------------------------------------------------------------------------------------------------------------------------------------------|--------------------------------------------------------------------------------------------------------------------------------------------------|
|         |      |     |    | Tetraparesis<br>Oculomotor paralysis.                                                                                         |                                                                                                           |     | density areas in the white matter.                                                                                                                                                                                                       |                                                                                                                                                  |
| Ancelle | 1985 | 4   |    | Oculomotor impairments<br>Dizziness<br>Impairment of visual field<br>Dysesthesia<br>Paresis                                   | -                                                                                                         | -   | -                                                                                                                                                                                                                                        | Outcome: 2 improvement, 2 death                                                                                                                  |
| Ellrodt | 1987 | 1 M | 58 | Quadriparesis<br>Brisk tendon reflexes<br>Bilateral Babinski sign                                                             | Normal pressure<br>Clear<br>Cells: 0<br>Protein: normal<br>Glucose: normal<br>Antibodies to Trichinella + | N/A | CT: multifocal low-density lesions in the corona radiata. Nodular enhancement of these lesions and gyral enhancement                                                                                                                     | Blood: leukocytosis with eosinophilia<br>EEG: bilateral, predominantly left, delta, and theta waves in the frontal area.<br>Outcome: improvement |
|         |      | 1 M | 56 | Confusion<br>Euphoria<br>Restlessness<br>Gait disturbance<br>Upper limb weakness<br>Impaired sensation                        | Normal                                                                                                    | N/A | CT: nonenhanced low-density areas in the left corona radiata; low-density areas in the anterior part of the right hemisphere.<br><b>MRI:</b> bilateral high signal-intensity lesions of the white matter and in the periventricular area | Blood: eosinophilia<br>EEG: frontal and temporal theta wave<br>Outcome: improvement                                                              |
|         |      | 1 M | 23 | Confusion<br>Transient dysesthesia in the left lower limb<br>Right upper limb monoplegia<br>Brisk right-sided tendon reflexes | Normal                                                                                                    | N/A | Contrast-enhanced CT scan: normal                                                                                                                                                                                                        | Blood: eosinophilia<br>EEG: bilateral slow waves, predominantly right, affecting the temporal and occipital regions.<br>Outcome: improvement     |
| Ryczak  | 1987 | 1 F | 62 | Confusion<br>Disorientation<br>Cortical blindness<br>Quadriplegia                                                             | Normal                                                                                                    | N/A | CT scan: normal<br>Angiogram: normal                                                                                                                                                                                                     | Blood: leukocytosis with initial eosinophilia.<br>Normal eosinophiles after 3 weeks, despite neurological aggravation<br>Outcome: improvement    |
| Vega    | 1987 | 1 M | 9  | Headache<br>Neck stiffness<br>Mental slowness<br>Dysarthria<br>Ataxia                                                         | Normal                                                                                                    | N/A | N/A                                                                                                                                                                                                                                      | Blood: leukocytosis with eosinophilia<br>Outcome: improvement                                                                                    |
|         |      | 1 M | 12 | Neck stiffness<br>Bradylalia<br>Obnubilation<br>Confusion<br>Hypertonia of lower limbs<br>Brisk lower limb tendon reflexes    | Normal                                                                                                    | N/A | N/A                                                                                                                                                                                                                                      | Blood: leukocytosis with eosinophilia<br>Outcome: improvement                                                                                    |
| Kreel   | 1988 | 1 F | 8  | Left sided focal seizures<br>Left Babinski sign                                                                               | -                                                                                                         | N/A | Skull radiograph: enlargement of the right middle fossa with elevation                                                                                                                                                                   | Blood: leukocytosis with eosinophilia<br>Associated diseases:                                                                                    |

|              |      |     |    |                                                                                                                                                                                                                                                                                  |                                                                                                                |     |                                                                                                                                                                                                                                                                                                                                                                                                                                                             |                                                                                                                   |
|--------------|------|-----|----|----------------------------------------------------------------------------------------------------------------------------------------------------------------------------------------------------------------------------------------------------------------------------------|----------------------------------------------------------------------------------------------------------------|-----|-------------------------------------------------------------------------------------------------------------------------------------------------------------------------------------------------------------------------------------------------------------------------------------------------------------------------------------------------------------------------------------------------------------------------------------------------------------|-------------------------------------------------------------------------------------------------------------------|
|              |      |     |    |                                                                                                                                                                                                                                                                                  |                                                                                                                |     | of the lesser wing of the sphenoid and slight enlargement of the superior orbital fissure<br>CT: two hypodense areas in the white matter, one in the right postero-superior region of parietal lobe and the other adjacent to the falx in the right frontal lobe<br>A small enhanced ring lesion of 8 mm was found adjacent to each of the hypodense edematous areas as well as a similar lesion in the left posterior parietal region adjacent to the falx | neonatal meningitis, with complete remission<br>Outcome: improvement                                              |
|              |      | 1 M | 43 | Headache                                                                                                                                                                                                                                                                         | -                                                                                                              | N/A | CT: 3 small calcified rings of 3-8 mm, one adjacent to the anterior aspect of the right frontal horn and the other two near the left posterior horn of the lateral ventricles. There was slight contrast enhancement of the anterior lesion, but no surrounding edema.                                                                                                                                                                                      | Blood: eosinophilia<br>Outcome: improvement                                                                       |
| Lopez-Lozano | 1988 | 1 M | 50 | Neck stiffness<br>Bilateral peripheral facial palsy<br>Tetraparesis<br>Generalized brisk tendon reflexes<br>Positive Kerning sign                                                                                                                                                | Normal pressure<br>Clear<br>Lymphocytes: 150 cells/mm <sup>3</sup><br>Proteins: 160 mg/dl<br>Glucose: 52 mg/dl | N/A | N/A                                                                                                                                                                                                                                                                                                                                                                                                                                                         | Blood: leukocytosis with eosinophilia<br>Outcome: improvement                                                     |
| Fourestie    | 1993 | 1 M | 54 | Headache<br>Mutism<br>Decreased cognitive abilities<br>Impaired memory<br>Temporal and spatial disorientation<br>Nocturnal agitation<br>Gait disturbance (which could not be accounted for by demonstrable sensory or motor deficits)<br>Right hemiparesis<br>Left Babinski sign | Cells: 2/mm <sup>3</sup><br>Protein: 48 mg/dl<br>Glucose: normal                                               | N/A | <b>CT:</b> multiple very small hypodense areas in the centrum semi-ovale of both cerebral hemispheres<br>Absent enhancing lesions<br><b>MRI:</b> (T2 weighted sequence) high signals in the periventricular white matter.                                                                                                                                                                                                                                   | Blood: eosinophilia<br>EEG: fluctuating bifrontal slowing of the electrocortical activity<br>Outcome: improvement |
|              |      | 1 M | 55 | Headache<br>Confusion<br>Spatial and temporal                                                                                                                                                                                                                                    | Cells: 0<br>Protein: 76 mg/dl<br>Glucose: normal                                                               |     | <b>CT:</b> focal hypodense area in the right frontal lobe cortex and multiple                                                                                                                                                                                                                                                                                                                                                                               | Blood: eosinophilia<br>EEG diffuse slowing of cortical activity                                                   |

|            |      |     |    |                                                                                                                                                                                                                                                                                                                                                                 |                                                                                    |                                                                                                                                                                                                                                                                                                                                                                                                        |                                                                                     |                                                                                                                                  |
|------------|------|-----|----|-----------------------------------------------------------------------------------------------------------------------------------------------------------------------------------------------------------------------------------------------------------------------------------------------------------------------------------------------------------------|------------------------------------------------------------------------------------|--------------------------------------------------------------------------------------------------------------------------------------------------------------------------------------------------------------------------------------------------------------------------------------------------------------------------------------------------------------------------------------------------------|-------------------------------------------------------------------------------------|----------------------------------------------------------------------------------------------------------------------------------|
|            |      |     |    | disorientation<br>Intellectual impairment<br>Behavioural abnormalities<br>Left Homer's sign<br>Gait problems<br>Bilateral ataxia<br>Right Babinski sign                                                                                                                                                                                                         |                                                                                    |                                                                                                                                                                                                                                                                                                                                                                                                        | bilateral small hypodense areas in the hemispheric white matter.                    | Outcome: improvement                                                                                                             |
|            | 1 M  | 72  |    | Headache<br>Confusion<br>Aphasia<br>Left sixth nerve palsy<br>Right hemiparesis<br>Right Babinski sign                                                                                                                                                                                                                                                          | Cells: 1 cell/mm3<br>Protein: normal<br>Glucose normal                             | Multiple small ischemic cavities in the hemispheric white matter and pons<br>Small cortical infarcts. Both lesions were < 1 cm and were pale or slightly hemorrhagic. Neither inflammatory infiltrates nor remnants of Trichinella larvae or microglial nodules were found.<br>Arteriolar microthrombi were found in, or close to, most ischemic areas. Some vessels showed non-inflammatory necrosis. | CT: unenhanced hypodensities in the white matter                                    | Blood: eosinophilia<br>Associated conditions: tremor<br>Outcome: death                                                           |
|            |      | 6   |    | Spatial-temporal disorientation 4/6<br>Intellectual deficit 2/6<br>Memory disturbances 3/6<br>Frontal syndrome 3/6<br>Behavioral disturbances 0/6<br>Somnolence 1/6<br>Tetraparesis 2/6<br>Headache 3/6<br>Oculomotor dysfunction 1/6<br>Central visual deficit: 3/6<br>Aphasia 1/6<br>Cerebellar syndrome 1/6<br>Central sensory deficit: 1/6<br>Myoclonus 1/6 | Normal 3/6<br>Protein: increased 2/6                                               | N/A                                                                                                                                                                                                                                                                                                                                                                                                    | CT:<br>Large cerebral infarction 0/6<br>Small hypodensities 6/6<br>Enhancement: 1/6 | Blood: eosinophilia<br>Outcome: improvement                                                                                      |
| Louthrenoo | 1993 | 1 M | 34 | Headache<br>Diplopia<br>Bilateral lateral rectus muscle paresis<br>Gaze-evoked nystagmus<br>Dysphagia<br>Tetraparesis<br>Bilateral pain and touch hypostasis<br>Bilateral decreased tendon reflexes                                                                                                                                                             | Clear<br>Mononuclear cells: 20 cells/mm3<br>Glucose: 67 mg/dl<br>Protein: 60 mg/dl | N/A                                                                                                                                                                                                                                                                                                                                                                                                    | N/A                                                                                 | Blood: absent leukocytosis, <b>no</b> eosinophilia<br>Associated diseases: HIV, mononeuropathy multiplex<br>Outcome: improvement |
| El Koussa  | 1994 | 1 M | 43 | -                                                                                                                                                                                                                                                                                                                                                               | -                                                                                  | -                                                                                                                                                                                                                                                                                                                                                                                                      | <b>MRI and angio-MRI:</b> right Rolandic hemorrhagic infarct and thrombosis of      | Outcome: death                                                                                                                   |

|          |      |     |    |                                                                                                                        |                                                                          |     |                                                                                                                                                                                                                                                                                                                                                                                                                                                                                                                                                                                                                                                                                                  |                                                                                                       |
|----------|------|-----|----|------------------------------------------------------------------------------------------------------------------------|--------------------------------------------------------------------------|-----|--------------------------------------------------------------------------------------------------------------------------------------------------------------------------------------------------------------------------------------------------------------------------------------------------------------------------------------------------------------------------------------------------------------------------------------------------------------------------------------------------------------------------------------------------------------------------------------------------------------------------------------------------------------------------------------------------|-------------------------------------------------------------------------------------------------------|
|          |      |     |    |                                                                                                                        |                                                                          |     | the superior sagittal and left lateral sinuses                                                                                                                                                                                                                                                                                                                                                                                                                                                                                                                                                                                                                                                   |                                                                                                       |
| Clausen  | 1996 | 1 F | 56 | Neck stiffness<br>Coma                                                                                                 | Initially normal<br>When patient was comatose:<br>Protein: 0.90-1.13 g/l | N/A | <b>CT:</b> leukoencephalopathy, and small hypodense areas                                                                                                                                                                                                                                                                                                                                                                                                                                                                                                                                                                                                                                        | Blood: leukocytosis with eosinophilia<br>Eosinophilia was absent at admission<br>Outcome: improvement |
| Feydy    | 1996 | 1 M | 60 | Headache<br>Right arm weakness<br>Aphasia                                                                              | Cells:0<br>Protein: 0.71 g/l                                             | N/A | <b>CT:</b> one small low-density area in the left centrum semiovale, and one in the right centrum semiovale, both without enhancement<br><b>MRI:</b> the bilateral centrum semiovale lesions with high signal on proton density- and T2-weighted images; they gave slightly low signal on T1-weighted images and did not enhance with Gd-DTPA. A high signal area was evident in the left precentral gyrus on proton density- and T2 images. There were subtle areas with the same signal characteristics in the right precentral and middle frontal gyri. There was focal gyriform enhancement of the left cerebral lesion and focal nodular enhancement in the right frontal cortical lesions. | Blood: eosinophilia<br>Outcome: improvement                                                           |
| De Graef | 2000 | 1   | -  | -                                                                                                                      | -                                                                        | -   | <b>MRI:</b> multifocal hyperintensities on T2 images                                                                                                                                                                                                                                                                                                                                                                                                                                                                                                                                                                                                                                             | -                                                                                                     |
| Knejevic | 2001 | 1   | 30 | Somnolence<br>Confusion<br>Disorientation<br>Right hemiparesis                                                         | Normal                                                                   | N/A | <b>MRI:</b> multifocal unspecific changes                                                                                                                                                                                                                                                                                                                                                                                                                                                                                                                                                                                                                                                        | EEG: moderate cerebral dysfunction<br>Outcome: improvement                                            |
| Gelal    | 2005 | 1 F | 61 | Neck stiffness<br>Headache<br>Somnolence<br>Confusion<br>Behavioral changes<br>Apathy<br>Right hemiparesis.<br>Ataxia, | -                                                                        | N/A | <b>MRI:</b> T2 and FLAIR sequences revealed several cortical and subcortical millimetric nodular lesions with slight signal increase<br>Images in T1 sequences were normal with no                                                                                                                                                                                                                                                                                                                                                                                                                                                                                                               | Blood: leukocytosis with eosinophilia<br>Outcome: improvement                                         |

Hyperesthesia dominant in the right hand

contrast enhancement  
Isotropic singleshot echo planar DW images revealed numerous lesions located in the subcortical and periventricular white matter of cerebral hemispheres, frontoparietal cortex, and splenium of corpus callosum. The lesions representing restricted diffusion were less than 1 cm in diameter. They were distributed mainly in the border-zones or distal fields of major cerebral arteries.  
Sequential evaluation of conventional and diffusion MRI data indicates that multifocal lesions were related to multiple infarctions rather than true inflammatory infiltration of the brain parenchyma.

|         |      |     |    |                                                                                              |          |                                                                                                                                                                                      |                                                                                                                                                                                                                                                                                                                                                                                                                                                                                                                                                                                              |                                                               |
|---------|------|-----|----|----------------------------------------------------------------------------------------------|----------|--------------------------------------------------------------------------------------------------------------------------------------------------------------------------------------|----------------------------------------------------------------------------------------------------------------------------------------------------------------------------------------------------------------------------------------------------------------------------------------------------------------------------------------------------------------------------------------------------------------------------------------------------------------------------------------------------------------------------------------------------------------------------------------------|---------------------------------------------------------------|
| Langner | 2007 | 1 M | 43 | Headache<br>Euphoria<br>Cortical blindness<br>Bilateral ptosis<br>Anisocoria<br>Tetraparesis | Cells: 0 | Stereotactically guided <b>brain biopsy</b> of a right frontal lesion showed active vasculitic changes with focal fibrinoid necrosis of the vessel wall and deposits of eosinophils. | <b>CT</b> : normal<br><b>MRI</b> : DWI sequences revealed multiple hyperintense lesions at the border zone of the middle cerebral artery and in both cerebellar hemispheres and the inferior vermis; all lesions were hypointense on apparent diffusion coefficient (ADC) maps. On T2-weighted and FLAIR images the lesions presented high signal intensity.<br>Intra-arterial angiography of the intracranial arteries was without evidence of vasculitis changes<br>The follow-up MRI (after 15 days) showed a decrease in the number of lesions on DWI, with peripheral enhancement after | Blood: leukocytosis with eosinophilia<br>Outcome: improvement |
|---------|------|-----|----|----------------------------------------------------------------------------------------------|----------|--------------------------------------------------------------------------------------------------------------------------------------------------------------------------------------|----------------------------------------------------------------------------------------------------------------------------------------------------------------------------------------------------------------------------------------------------------------------------------------------------------------------------------------------------------------------------------------------------------------------------------------------------------------------------------------------------------------------------------------------------------------------------------------------|---------------------------------------------------------------|

|           |      |     |    |                                                                                                                                                                                                                           |                                                                                                                                                     |     |                                                                                                                                                                                                                                                                                                                                                                                                                                                                                                                                                                                                                                                                                    |                                                                                                               |
|-----------|------|-----|----|---------------------------------------------------------------------------------------------------------------------------------------------------------------------------------------------------------------------------|-----------------------------------------------------------------------------------------------------------------------------------------------------|-----|------------------------------------------------------------------------------------------------------------------------------------------------------------------------------------------------------------------------------------------------------------------------------------------------------------------------------------------------------------------------------------------------------------------------------------------------------------------------------------------------------------------------------------------------------------------------------------------------------------------------------------------------------------------------------------|---------------------------------------------------------------------------------------------------------------|
|           |      |     |    |                                                                                                                                                                                                                           |                                                                                                                                                     |     | intravenous Gd-DTPA indicating blood–brain-barrier breakdown.                                                                                                                                                                                                                                                                                                                                                                                                                                                                                                                                                                                                                      |                                                                                                               |
| Madariaga | 2007 | 1 F | 53 | Disorientation<br>Apathy<br>Aphasia<br>Coma<br>Left upper limb paresis                                                                                                                                                    | Red blood cells: multiple (traumatic puncture)<br>Neutrophils: 8<br>Protein: 64 mg/dL<br>Glucose: 140 mg/dL                                         | N/A | <b>CT:</b> normal<br><b>MRI:</b> nonspecific white matter changes                                                                                                                                                                                                                                                                                                                                                                                                                                                                                                                                                                                                                  | Blood: Leukocytosis <b>without</b> eosinophilia<br>Eosinophilia appeared 3 days later<br>Outcome: improvement |
| Neghina   | 2011 | 1 F | 65 | Muscle fasciculations<br>Left hemiplegia                                                                                                                                                                                  | -                                                                                                                                                   | -   | N/A                                                                                                                                                                                                                                                                                                                                                                                                                                                                                                                                                                                                                                                                                | Blood: eosinophilia                                                                                           |
|           |      | 1 M | 26 | Left hemiparesis                                                                                                                                                                                                          | -                                                                                                                                                   | N/A | <b>N/A</b>                                                                                                                                                                                                                                                                                                                                                                                                                                                                                                                                                                                                                                                                         | Blood: eosinophilia without leukocytosis                                                                      |
|           |      | 1 M | 33 | Right hemiparesis                                                                                                                                                                                                         | -                                                                                                                                                   | N/A | <b>N/A</b>                                                                                                                                                                                                                                                                                                                                                                                                                                                                                                                                                                                                                                                                         | Blood: absent leukocytosis, <b>without</b> eosinophilia                                                       |
|           |      | 1 M | 28 | Encephalitis<br>Right arm monoplegia                                                                                                                                                                                      | -                                                                                                                                                   | N/A | <b>N/A</b>                                                                                                                                                                                                                                                                                                                                                                                                                                                                                                                                                                                                                                                                         | Blood: leukocytosis with eosinophilia                                                                         |
|           |      | 1 F | 54 | Encephalitis                                                                                                                                                                                                              | -                                                                                                                                                   | N/A | <b>N/A</b>                                                                                                                                                                                                                                                                                                                                                                                                                                                                                                                                                                                                                                                                         | Blood: leukocytosis with eosinophilia                                                                         |
|           |      | 1 F | 24 | Encephalitis                                                                                                                                                                                                              | -                                                                                                                                                   | N/A | <b>N/A</b>                                                                                                                                                                                                                                                                                                                                                                                                                                                                                                                                                                                                                                                                         | Blood: leukocytosis                                                                                           |
|           |      | 1 F | 17 | Meningeal signs                                                                                                                                                                                                           | -                                                                                                                                                   | N/A | <b>N/A</b>                                                                                                                                                                                                                                                                                                                                                                                                                                                                                                                                                                                                                                                                         | Blood: leukocytosis with eosinophilia                                                                         |
| McDonald  | 2014 | 1 M | 41 | Headache<br>Confusion<br>Somnolence<br>Impaired concentration<br>Aphasia<br>“Red spots” briefly appearing in the visual field<br>Left face numbness<br>Left arm numbness and weakness<br>Ataxia<br>Normal tendon reflexes | Erythrocytes: 9.5/mm <sup>3</sup><br>Leukocytes 3.6/mm <sup>3</sup><br>Protein: 34 mg/dL<br>Glucose: 57.6 mg/dL<br>Negative Gram stain and culture. | N/A | <b>CT:</b> areas of decreased attenuation bilaterally in the periventricular regions of the frontal lobes.<br><b>MRI:</b> multiple bilateral areas of increased signal intensity in the deep white matter and gray–white matter interface of the frontal and parietal lobes bilaterally, with very few lesions seen in the occipital and temporal lobes and the cerebellum on FLAIR and T2-weighted scans. DWI scans demonstrated restriction in some of the deep white matter lesions, indicating ischemia. Lesions were slightly hypointense on unenhanced T1 images and there was no pathologic blooming artifact on T2 gradient echo sequences that would have suggested blood | Blood: leukocytosis with eosinophilia<br>Outcome: improvement                                                 |



|            |      |     |    |                                                                                                                                             |        |     |                                                                                                                                                                                                                                                                                                                         |                                                                                                                                                             |
|------------|------|-----|----|---------------------------------------------------------------------------------------------------------------------------------------------|--------|-----|-------------------------------------------------------------------------------------------------------------------------------------------------------------------------------------------------------------------------------------------------------------------------------------------------------------------------|-------------------------------------------------------------------------------------------------------------------------------------------------------------|
|            |      |     |    |                                                                                                                                             |        |     | products.<br>Following contrast administration, there was an intense rim of enhancement in most lesions.                                                                                                                                                                                                                |                                                                                                                                                             |
| Moscatelli | 2014 | 1 F | 14 | Weakness of the soft palate<br>Left facial hemiparesis<br>Tetraparesis,<br>Lower limb clonus                                                | Normal | N/A | <b>CT:</b> hypodense, multifocal, small lesions in the cortex and white substance<br><b>MRI:</b> multifocal lesions hypointense in T1 sequences and hyperintense in T2-weighted images<br>The lesions were without mass effect, situated in the white substance and in the periependymal region, and enhanced contrast. | Blood: leukocytosis with eosinophilia<br>Outcome: improvement                                                                                               |
| Batzlaff   | 2014 | 1 F | 72 | Confusion<br>Short term memory impairment<br>Visual hallucinations<br>Anisocoria                                                            | -      | N/A | <b>N/A</b>                                                                                                                                                                                                                                                                                                              | Blood: leukocytosis with eosinophilia<br>Associated diseases: IgG deficiency requiring monthly intravenous immunoglobulin infusions<br>Outcome: improvement |
| Dalcin     | 2017 | 1 M | 41 | Headache<br>Optic fundi: bilateral papilledema<br>Blurred vision<br>Bilateral sixth cranial nerve palsy                                     | N/A    | N/A | <b>CT:</b> acute cerebral sinus venous thrombosis<br><b>MRI:</b> a partially occlusive thrombus in the superior sagittal sinus and complete occlusion into the left transverse sinus.<br>The inferior sagittal sinus and straight sinuses were also found to have thrombi within them                                   | Blood: normal leukocytes, <b>without</b> eosinophilia<br>Outcome: improvement                                                                               |
| Rosca      | 2018 | 1 M | 59 | Drowsiness<br>Cognitive impairment Behavioral disturbances<br>Receptive aphasia<br>Tetraparesis<br>Globally diminished deep tendon reflexes | N/A    | N/A | <b>CT:</b> normal<br><b>MRI:</b> multiple nodular lesions, with high signal in T2 and FLAIR sequences, located relatively symmetrically, in the deep white matter and grey-white matter interface of cerebral hemispheres and the cerebellum (border zone lesions).<br>No contrast enhancement                          | Blood: leukocytosis with eosinophilia<br>Outcome: improvement                                                                                               |
| Mitrovic   | 2019 | 1 F | 51 | Confusion                                                                                                                                   | Normal | N/A | <b>CT:</b> hypodense lesions                                                                                                                                                                                                                                                                                            | Blood: leukocytosis with                                                                                                                                    |

Apathy  
Right central facial paresis Right  
hemiparesis  
Brisk brachioradialis, triceps and  
patellar reflexes  
Babinski sign: indifference on the  
right side

Trichinella larvae: absent

bilaterally in the parietal  
region, with no signs of  
compression.  
**MRI:** bilateral white matter  
lesions in the cerebral  
hemispheres (watershed  
zones ACA and ACM),  
lesions in the right  
thalamus and  
infratentorially (including  
cerebellum) on the left  
side.

eosinophilia  
EEG: normal  
Outcome: improvement
